# Supplementary material for: Industrial kinetic resolution of d,l-pantolactone by an immobilized whole-cell biocatalyst
Source: Royal Society of Chemistry journal article supplement (doi:10.1039/d1ra05708a), 2021-01-01

## **Supplementary information**

### **Industrial kinetic resolution of D,L-pantolactone by immobilized whole-cell biocatalyst**

Qiu-Hua Zhang,\* Liu Yang, Yi-Bin Tang, Liu-Nv Huang, Wen-Fang Luo

Brother research center, Jiangxi Brother Pharmaceutical Co.,LTD, Jiujiang, 332700, China.

\*E-mail: zqh@brother.com.cn

The shape of immobilized cell of *Pichia pastoris* ZMU-125

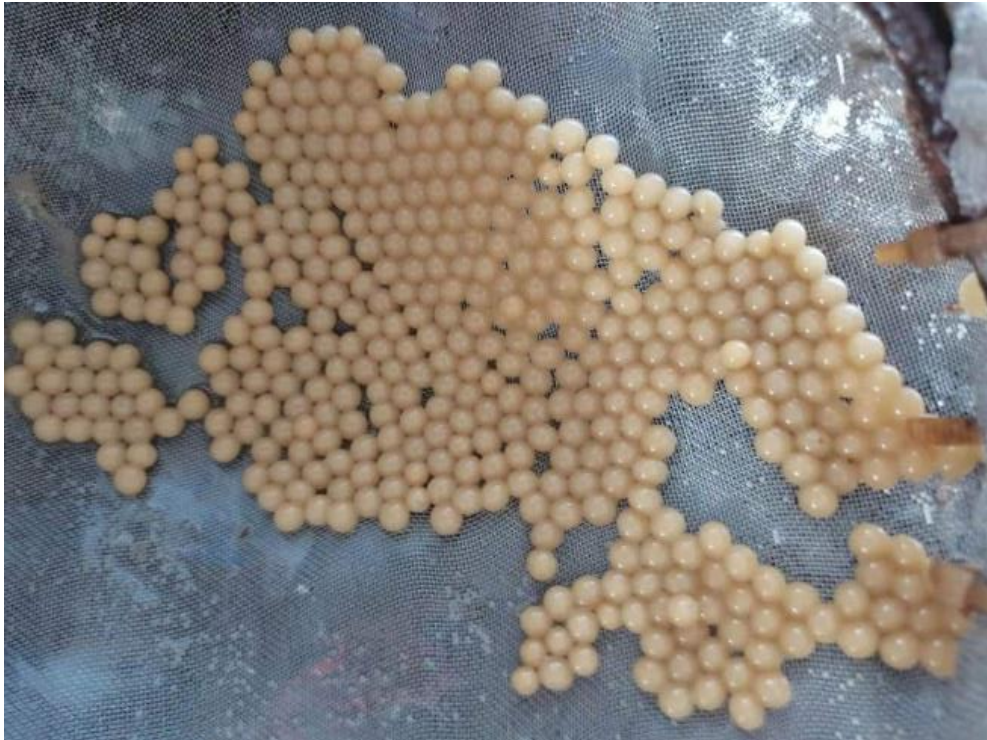

The schematic diagram for continuous hydrolysis of D,L-PL.

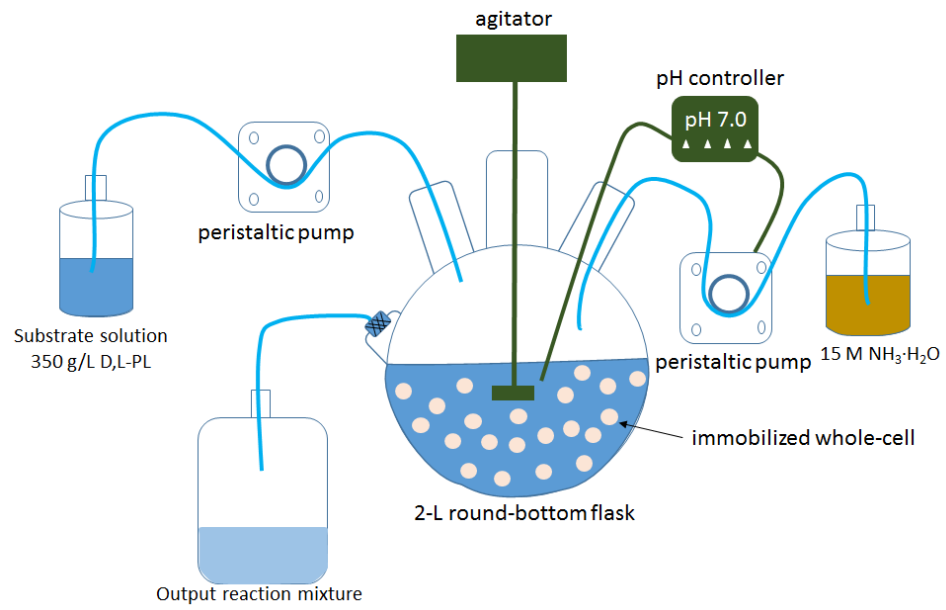

The HPLC chromatogram for D,L-PL and D,L-PA.

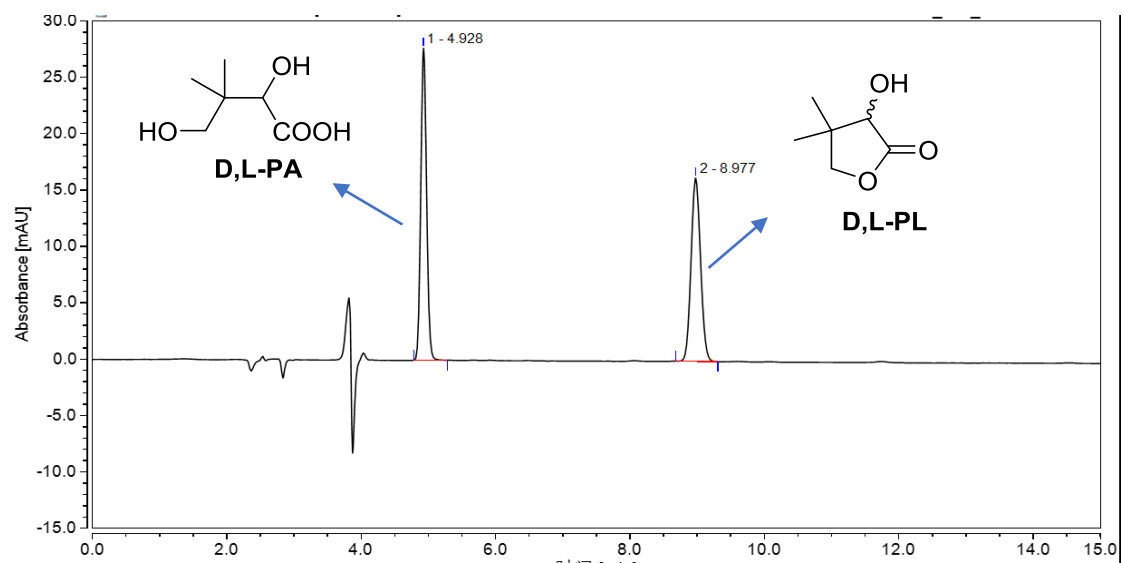

The chiral GC chromatogram for racemic D,L-PL.

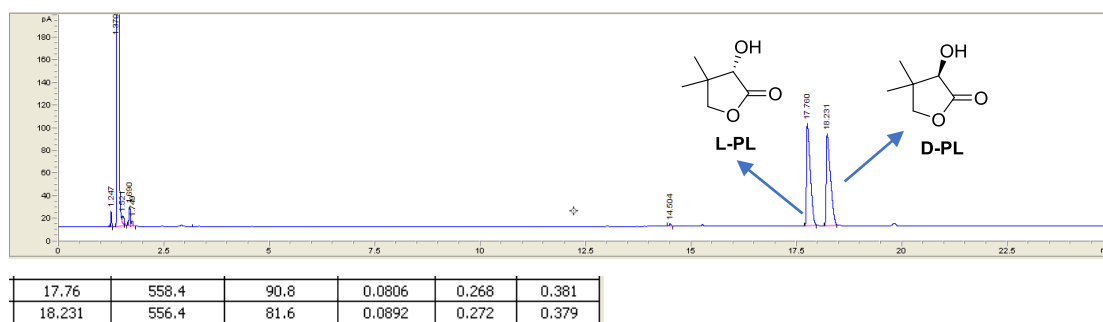

The chiral GC chromatogram for biocatalytic kinetic resolution of D,L-PL.

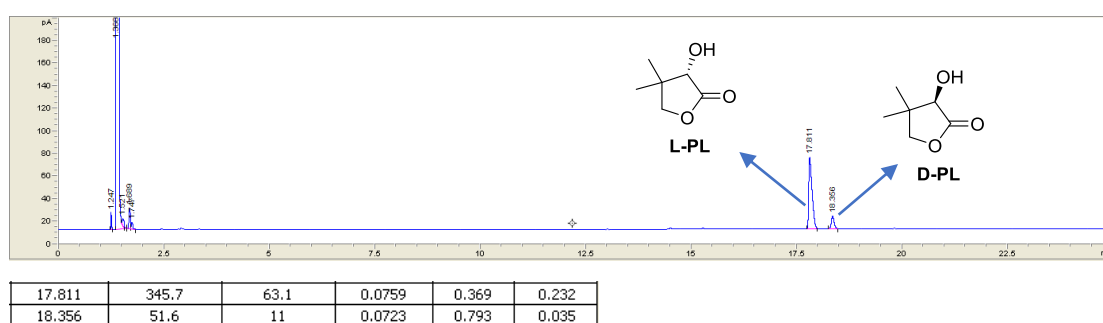

The chiral HPLC chromatogram for racemic D,L-PA.

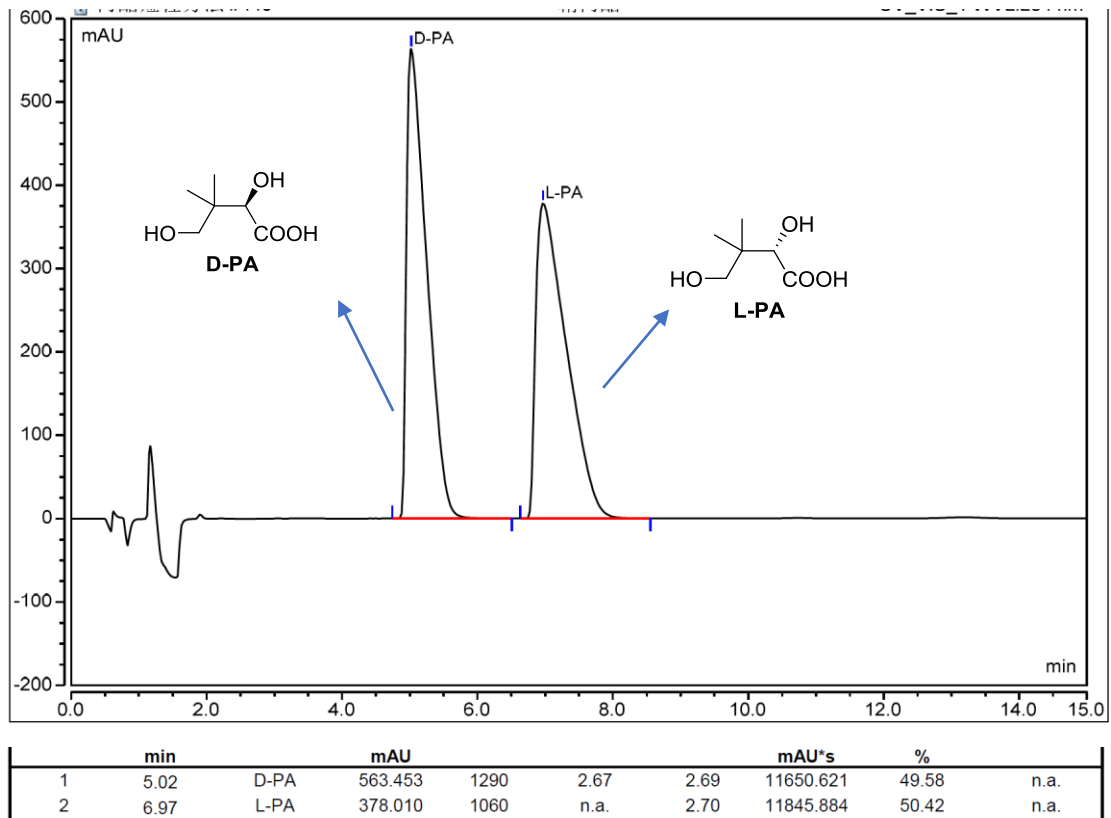

The chiral HPLC chromatogram for enzymatic synthesized chiral D-PA.

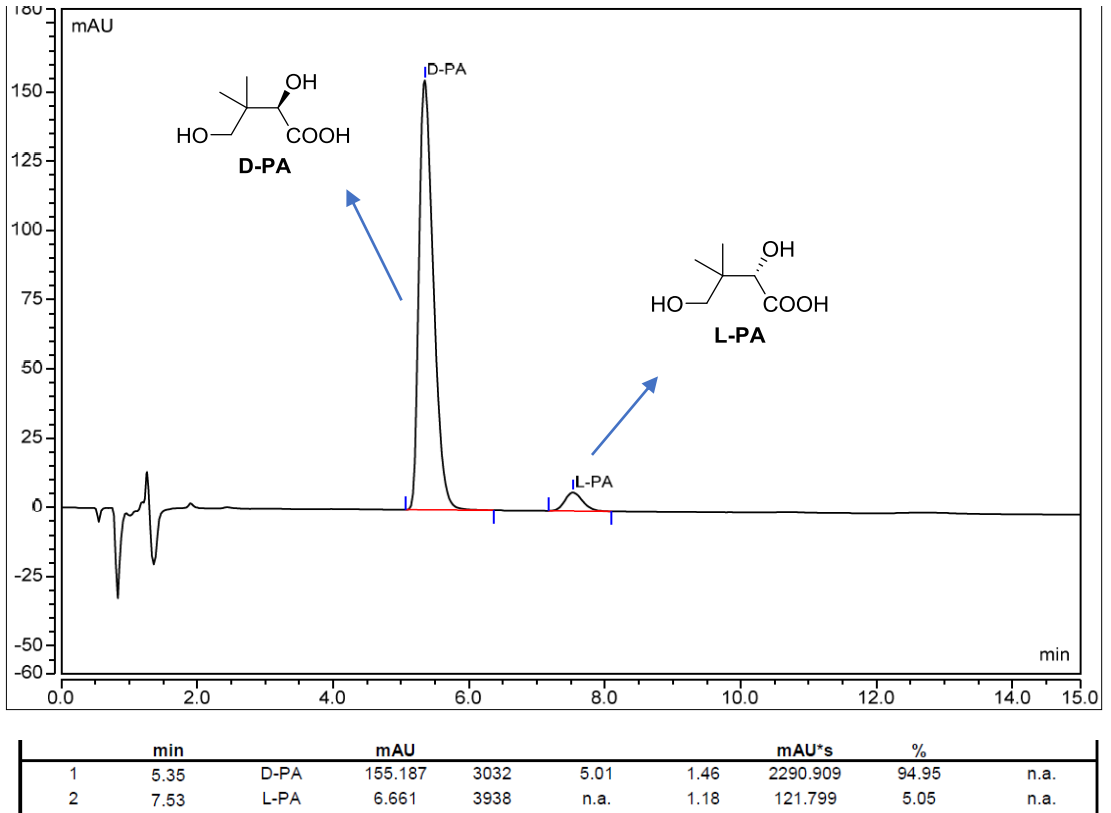

NMR spectra of the purified D-PL.

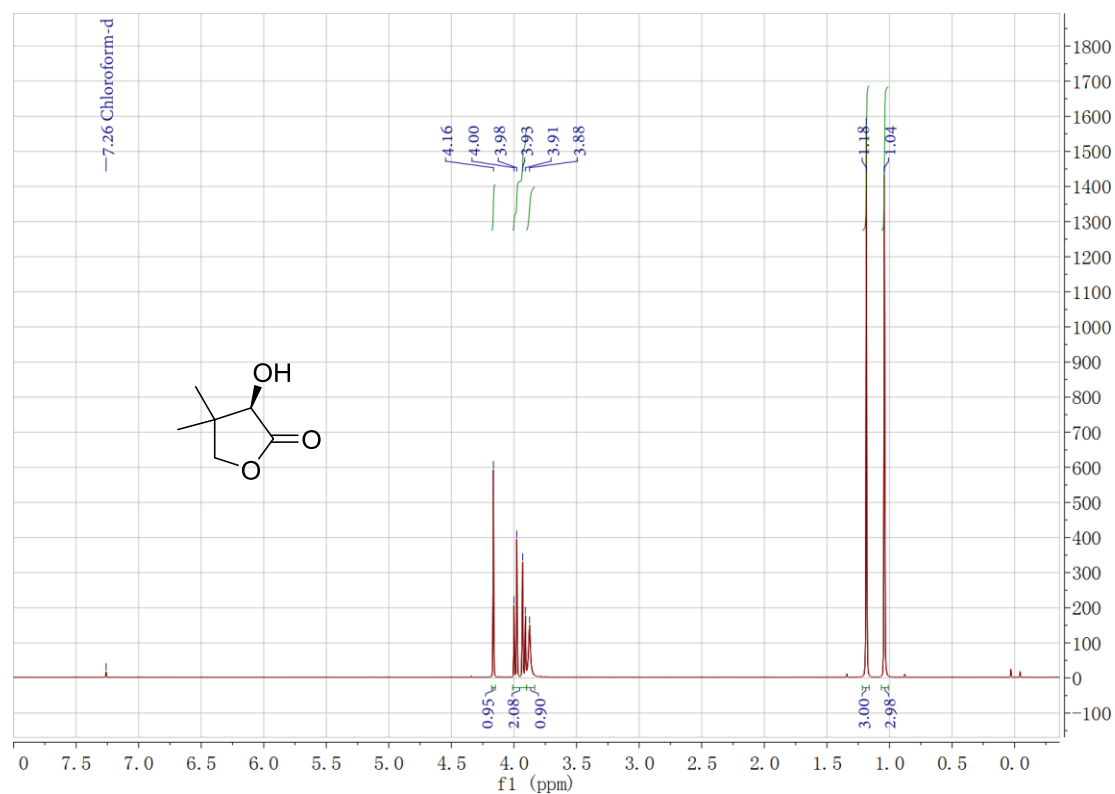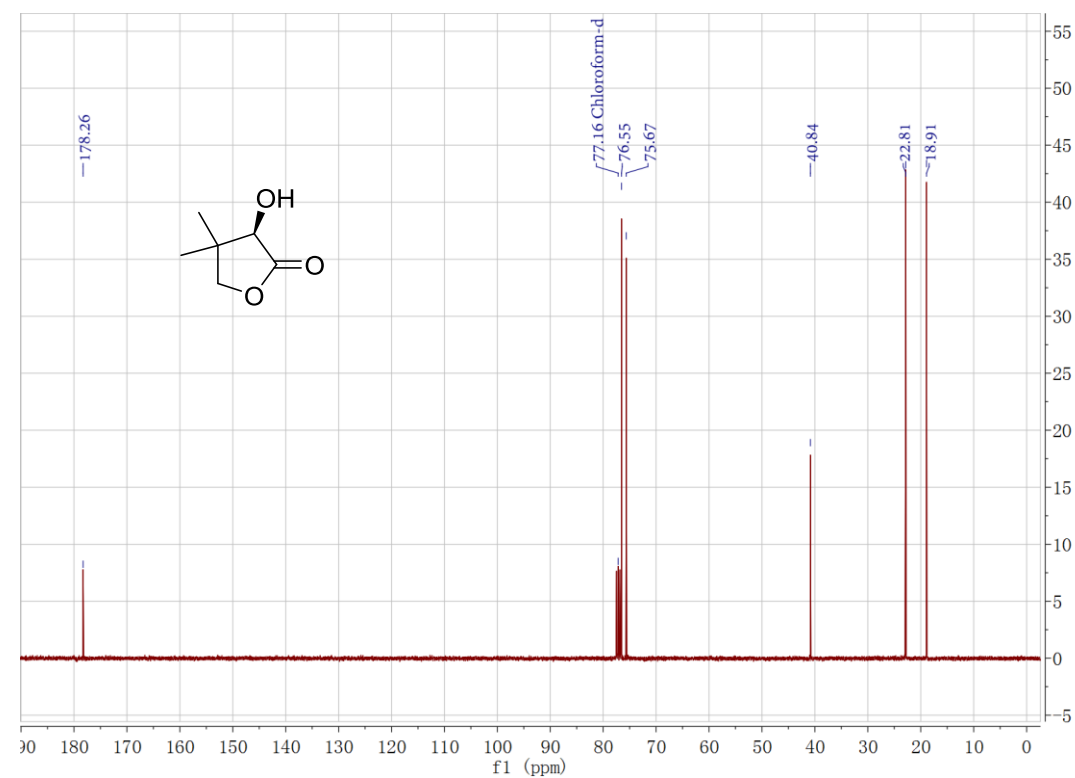

Supplement: d1ra05708a1.pdf [file d1ra05708a1.pdf]
